# Supplementary material for: Effects of 405 ± 5-nm LED Illumination on Environmental Stress Tolerance of Salmonella Typhimurium in Sliced Beef
Source: MDPI journal article supplement (doi:10.3390/foods11020136), 2022-01-06
Supplement: s1 [file s1]

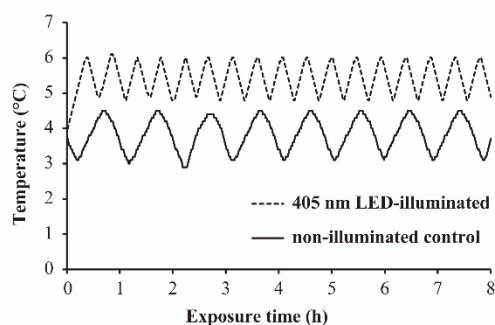

**Figure S1.** Temperature profile in phosphate-buffered saline during 405 nm LED-illumination at 4 °C.

**Table S1.** Primers of environmental tolerance-associated genes of *S. Typhimurium* SL1344.

| Target gene | Sequence of primers (5'–3')                          | Reference  |
|-------------|------------------------------------------------------|------------|
| 16S rRNA    | F, AGGCCTTCGGGTTGTAAAGT<br>R, GTTAGCCGGTGCTTCTTCTG   | [1]        |
| <i>phoP</i> | F, GAAGGCTGGCAGGATAAA<br>R, CGGATAAGCGTTTCCATAA      | This study |
| <i>phoQ</i> | F, ACAAATACCGCACGACCC<br>R, CCGGCTGATCTGTTCCAG       | This study |
| <i>hfq</i>  | F, TAAGCTGCAAGGTCAAATC<br>R, GACGGGACAACAGTAGAAAT    | This study |
| <i>acrA</i> | F, CGGTCGTATTGGTAAGTCATC<br>R, GGTAACGCCCTGTTGTGGA   | This study |
| <i>acrB</i> | F, TCTATCCCGTTCTCCGTAATG<br>R, GAACTGATAACCAGCGGCATA | This study |
| <i>rpoS</i> | F, CAGCCGTATGCTTCGTCTCA<br>R, TTTTCATCGGCCAGGATGTC   | This study |
| <i>rpoH</i> | F, TTATCGGCTGACGAGGAG<br>R, TGTACGGCGAAAGAAACC       | This study |
| <i>rpoE</i> | F, AAGTGGCGAGTCTGGTTT<br>R, CTCCCGTAAGGTGATTGC       | This study |

1. Lamas, A.;Regal P.;Vázquez B.;Miranda J. M.;Cepeda A.;Franco C. M. Influence of milk, chicken residues and oxygen levels on biofilm formation on stainless steel, gene expression and small RNAs in *Salmonella enterica*. *Food Control*, **2018**, 90: 1-9.
